# Supplementary material
Source: PubMed Central journal article supplement (PMC10919340)
Supplement: djad224_supplementary_data.pdf [file djad224_supplementary_data.pdf]

## Supplementary Materials

Jackson et al. "Sex differences in cancer incidence among solid organ transplant recipients"

| <b>Supplementary Table 1.</b> Cancer sites and their ICD-0-3 site and histology codes evaluated in the Transplant Cancer Match Study |                                                                                                                                          |                                                                                                                                                                                          |
|--------------------------------------------------------------------------------------------------------------------------------------|------------------------------------------------------------------------------------------------------------------------------------------|------------------------------------------------------------------------------------------------------------------------------------------------------------------------------------------|
| <b>Cancer Site</b>                                                                                                                   | <b>ICD-0-3 Site</b>                                                                                                                      | <b>ICD-O-3 Histology (Type)</b>                                                                                                                                                          |
| Lip                                                                                                                                  | C000–C009                                                                                                                                | excluding 9050-9055, 9140,<br>9590-9992                                                                                                                                                  |
| Oral cavity                                                                                                                          | C019–C029, C079–C089,<br>C040–C049, C030–C039,<br>C050–C059, C060–C069,<br>C110–C119, C090–C099,<br>C129, C130–C139, C140,<br>C142, C148 |                                                                                                                                                                                          |
| Oropharynx                                                                                                                           | C100–C109                                                                                                                                |                                                                                                                                                                                          |
| Esophagus                                                                                                                            | C150–C159                                                                                                                                |                                                                                                                                                                                          |
| Stomach                                                                                                                              | C160–C169                                                                                                                                |                                                                                                                                                                                          |
| Colorectal                                                                                                                           |                                                                                                                                          |                                                                                                                                                                                          |
| Proximal colon                                                                                                                       | C180–C185                                                                                                                                |                                                                                                                                                                                          |
| Distal colon                                                                                                                         | C186–C187                                                                                                                                |                                                                                                                                                                                          |
| Unspecified colon                                                                                                                    | C188–C189, C260                                                                                                                          |                                                                                                                                                                                          |
| Rectum                                                                                                                               | C199, C209                                                                                                                               |                                                                                                                                                                                          |
| Liver                                                                                                                                | C220, C221                                                                                                                               |                                                                                                                                                                                          |
| Larynx                                                                                                                               | C320–C329                                                                                                                                |                                                                                                                                                                                          |
| Lung and bronchus                                                                                                                    | C340–C349                                                                                                                                |                                                                                                                                                                                          |
| Melanoma skin                                                                                                                        | C440–C449                                                                                                                                |                                                                                                                                                                                          |
| Bladder                                                                                                                              | C670–C679                                                                                                                                |                                                                                                                                                                                          |
| Kidney and renal pelvis                                                                                                              | C649, C659                                                                                                                               |                                                                                                                                                                                          |
| Thyroid                                                                                                                              | C739                                                                                                                                     |                                                                                                                                                                                          |
| Non-Hodgkin lymphoma                                                                                                                 | C024, C098, C099, C111,<br>C142, C379, C422, C770–C779                                                                                   | 9590-9597, 9670-9671, 9673,<br>9675, 9678-9680, 9684, 9687-<br>9691, 9695, 9698-9702, 9705,<br>9708-9709, 9712, 9714-9719,<br>9724-9729, 9735, 9737-9738,<br>9811-9818, 9823, 9827, 9837 |
| Kaposi sarcoma                                                                                                                       |                                                                                                                                          | 9140                                                                                                                                                                                     |

**Supplementary Table 2.** Male-to-female incidence rate ratios (IRRs) and 95% confidence intervals (CIs) in the transplant population and the general population for all cancer sites stratified by age

| Cancer site                   | <55 years of age at transplantation       |                       |                      | ≥55 years of age at transplantation       |                       |                      |
|-------------------------------|-------------------------------------------|-----------------------|----------------------|-------------------------------------------|-----------------------|----------------------|
|                               | M:F IRR <sub>Transplant</sub><br>(95% CI) | M:F IRR <sub>GP</sub> | P-value <sup>a</sup> | M:F IRR <sub>Transplant</sub><br>(95% CI) | M:F IRR <sub>GP</sub> | P-value <sup>a</sup> |
| Lip                           | 1.75 (1.22, 2.52)                         | 3.57                  | 0.0001               | 1.82 (1.20, 2.78)                         | 3.98                  | 0.0002               |
| Oral cavity                   | 1.71 (1.23, 2.37)                         | 2.27                  | 0.090                | 1.93 (1.37, 2.73)                         | 2.11                  | 0.612                |
| Oropharynx                    | 1.00 (0.17, 6.00)                         | 2.25                  | 0.372                | —                                         | 2.08                  | —                    |
| Esophagus                     | 4.01 (2.43, 6.60)                         | 4.76                  | 0.501                | 3.43 (2.22, 5.30)                         | 4.29                  | 0.314                |
| Adenocarcinoma                | 14.92 (4.69, 47.45)                       | 8.84                  | 0.375                | 6.61 (3.21, 13.64)                        | 8.25                  | 0.743                |
| Squamous cell carcinoma       | 1.80 (0.95, 3.40)                         | 2.37                  | 0.398                | 1.72 (0.96, 3.10)                         | 2.14                  | 0.465                |
| Stomach                       | 1.18 (0.86, 1.62)                         | 1.57                  | 0.005                | 1.69 (1.29, 2.21)                         | 2.10                  | 0.114                |
| Colorectum                    | 0.99 (0.84, 1.17)                         | 1.38                  | <0.0001              | 0.93 (0.81, 1.08)                         | 1.39                  | <0.0001              |
| Proximal colon                | 0.90 (0.71, 1.14)                         | 1.22                  | 0.012                | 0.74 (0.61, 0.88)                         | 1.11                  | <0.0001              |
| Distal colon                  | 1.21 (0.87, 1.69)                         | 1.34                  | 0.547                | 1.29 (0.94, 1.77)                         | 1.59                  | 0.195                |
| Rectum                        | 1.11 (0.79, 1.56)                         | 1.58                  | 0.042                | 1.43 (0.97, 2.10)                         | 1.74                  | 0.319                |
| Liver                         | 2.51 (1.85, 3.40)                         | 4.18                  | 0.001                | 2.20 (1.65, 2.94)                         | 2.95                  | 0.047                |
| Larynx                        | 5.29 (2.97, 9.43)                         | 4.41                  | 0.537                | 2.76 (1.85, 4.12)                         | 5.05                  | 0.003                |
| Lung                          | 1.18 (1.05, 1.32)                         | 1.29                  | 0.127                | 1.34 (1.23, 1.46)                         | 1.34                  | 1.0                  |
| Adenocarcinoma                | 0.87 (0.73, 1.04)                         | 1.04                  | 0.050                | 1.06 (0.92, 1.22)                         | 1.12                  | 0.444                |
| Squamous cell carcinoma       | 1.90 (1.50, 2.40)                         | 2.32                  | 0.096                | 1.61 (1.39, 1.86)                         | 1.99                  | 0.004                |
| Small cell carcinoma          | 1.51 (1.01, 2.27)                         | 1.20                  | 0.266                | 1.47 (1.10, 1.96)                         | 1.19                  | 0.152                |
| Kidney                        | 1.78 (1.57, 1.98)                         | 2.21                  | 0.0003               | 1.49 (1.29, 1.72)                         | 2.17                  | <0.0001              |
| Bladder                       | 1.35 (1.03, 1.78)                         | 3.80                  | <0.0001              | 2.60 (2.01, 3.37)                         | 4.09                  | 0.0006               |
| Thyroid                       | 0.45 (0.37, 0.54)                         | 0.33                  | 0.001                | 0.58 (0.44, 0.77)                         | 0.52                  | 0.444                |
| Melanoma skin                 | 1.47 (1.21, 1.79)                         | 1.28                  | 0.166                | 2.53 (2.06, 3.13)                         | 2.29                  | 0.350                |
| Kaposi sarcoma <sup>b</sup>   | 1.74 (1.08, 2.82)                         | 50.17                 | <0.0001              | 1.74 (1.14, 2.66)                         | 10.14                 | <0.0001              |
| Non-Hodgkin lymphoma          | 1.35 (1.22, 1.48)                         | 1.63                  | <0.0001              | 1.30 (1.16, 1.46)                         | 1.56                  | 0.002                |
| Diffuse large B-cell lymphoma | 1.25 (1.10, 1.41)                         | 1.75                  | <0.0001              | 1.22 (1.06, 1.42)                         | 1.44                  | 0.026                |

Abbreviations: GP, general population; M:F IRR, male-to-female incidence rate ratio; NHL, non-Hodgkin lymphoma.

Bolding indicates the M:F IRR<sub>Transplant</sub> is statistically different from M:F IRR<sub>GP</sub>

<sup>a</sup> Estimated from a chi-square test using the formula  $\log(\text{M:F IRR}_{\text{Transplant}} - \text{IRR}_{\text{GP}})^2 / \text{Var}(\text{M:F IRR}_{\text{Transplant}})$  with 1 degree of freedom comparing M:F IRR<sub>Transplant</sub> to M:F IRR<sub>GP</sub>.

<sup>b</sup> Estimates of the M:F IRR<sub>Transplant</sub> were restricted to non-Hispanic White and non-Hispanic Black participants in SEER9 (1973-1979) to calculate the M:F IRR<sub>GP</sub>.

**Supplementary Table 3.** Multivariable adjusted male-to-female incidence rate ratios (IRRs) and 95% confidence intervals (CIs) for all cancer sites among all transplant recipients and separately according to transplanted organ

| Cancer site                                | All recipients                         | Liver recipients                       | Kidney recipients                      | Heart and/or lung recipients           | P-value <sup>a</sup> |
|--------------------------------------------|----------------------------------------|----------------------------------------|----------------------------------------|----------------------------------------|----------------------|
|                                            | M:F IRR <sub>Transplant</sub> (95% CI) |                      |
| Lip <sup>b</sup>                           | 1.43 (1.08, 1.90)                      | 2.36 (0.96, 5.79)                      | 1.62 (1.08, 2.41)                      | 1.12 (0.69, 1.80)                      | 0.352                |
| Oral cavity                                | 1.78 (1.40, 2.27)                      | 1.82 (1.21, 2.73)                      | 1.92 (1.34, 2.74)                      | 1.83 (0.92, 3.61)                      | 0.406                |
| Oropharynx                                 | 1.59 (0.31, 8.21)                      | 1.28 (0.12, 14.16)                     | 2.08 (0.22, 20.0)                      | —                                      | 0.726                |
| Esophagus                                  | 3.37 (2.41, 4.70)                      | 2.94 (1.60, 5.40)                      | 3.71 (2.33, 5.91)                      | 3.53 (1.51, 8.23)                      | 0.690                |
| Adenocarcinoma                             | 1.79 (1.15, 2.80)                      | 1.83 (0.88, 3.81)                      | 1.95 (1.03, 3.69)                      | 1.24 (0.34, 4.50)                      | 0.439                |
| Squamous cell carcinoma                    | 7.56 (4.08, 13.97)                     | —                                      | 6.92 (3.18, 15.03)                     | —                                      | —                    |
| Stomach                                    | 1.52 (1.23, 1.88)                      | 1.55 (0.95, 2.53)                      | 1.31 (1.01, 1.70)                      | 3.72 (1.79, 7.74)                      | 0.006                |
| Colorectum <sup>c</sup>                    | 0.91 (0.81, 1.02)                      | 0.79 (0.63, 1.00)                      | 1.04 (0.89, 1.21)                      | 0.79 (0.61, 1.03)                      | 0.019                |
| Proximal colon <sup>c</sup>                | 0.75 (0.64, 0.87)                      | 0.66 (0.49, 0.89)                      | 0.84 (0.68, 1.04)                      | 0.66 (0.46, 0.93)                      | 0.081                |
| Distal colon <sup>c</sup>                  | 1.23 (0.96, 1.56)                      | 1.22 (0.71, 2.07)                      | 1.32 (0.96, 1.81)                      | 1.11 (0.60, 2.09)                      | 0.534                |
| Rectum <sup>c</sup>                        | 1.16 (0.89, 1.51)                      | 1.07 (0.58, 1.95)                      | 1.28 (0.90, 1.81)                      | 1.19 (0.63, 2.26)                      | 0.904                |
| Liver <sup>d</sup>                         | 2.06 (1.65, 2.56)                      | 2.03 (1.42, 2.92)                      | 2.10 (1.54, 2.85)                      | 1.64 (0.83, 3.22)                      | 0.265                |
| Larynx                                     | 3.34 (2.40, 4.65)                      | 4.46 (2.43, 8.22)                      | 3.57 (2.18, 5.84)                      | 1.78 (0.92, 3.43)                      | 0.131                |
| Lung                                       | 1.14 (1.06, 1.22)                      | 1.07 (0.91, 1.26)                      | 1.26 (1.14, 1.39)                      | 1.17 (1.02, 1.34)                      | 0.458                |
| Adenocarcinoma                             | 0.89 (0.79, 0.99)                      | 1.25 (0.95, 1.64)                      | 1.60 (1.33, 1.92)                      | 1.67 (1.32, 2.12)                      | 0.756                |
| Squamous cell carcinoma                    | 1.47 (1.30, 1.67)                      | 0.79 (0.60, 1.04)                      | 0.96 (0.82, 1.12)                      | 0.96 (0.77, 1.20)                      | 0.980                |
| Small cell carcinoma                       | 1.33 (1.05, 1.69)                      | 1.28 (0.78, 2.11)                      | 1.59 (1.11, 2.27)                      | 1.16 (0.75, 1.80)                      | 0.205                |
| Kidney <sup>c</sup>                        | 1.76 (1.60, 1.93)                      | 1.48 (1.06, 2.06)                      | 1.71 (1.55, 1.90)                      | 2.31 (1.60, 3.35)                      | 0.003                |
| Bladder                                    | 1.87 (1.54, 2.26)                      | 2.79 (1.51, 5.15)                      | 1.79 (1.42, 2.24)                      | 2.15 (1.33, 3.46)                      | 0.256                |
| Thyroid <sup>e</sup>                       | 0.49 (0.42, 0.58)                      | 0.45 (0.29, 0.71)                      | 0.51 (0.42, 0.61)                      | 0.54 (0.34, 0.85)                      | 0.843                |
| Melanoma skin <sup>b</sup>                 | 1.76 (1.53, 2.04)                      | 1.21 (0.88, 1.66)                      | 1.90 (1.57, 2.28)                      | 2.03 (1.37, 3.00)                      | 0.795                |
| Kaposi sarcoma <sup>f</sup>                | 1.68 (1.12, 2.45)                      | 1.35 (0.61, 2.98)                      | 2.25 (1.31, 3.88)                      | 0.39 (0.11, 1.38)                      | 0.049                |
| Non-Hodgkin lymphoma <sup>g</sup>          | 1.26 (1.17, 1.36)                      | 1.18 (1.01, 1.37)                      | 1.37 (1.23, 1.52)                      | 1.14 (0.95, 1.36)                      | 0.014                |
| Diffuse large B-cell lymphoma <sup>g</sup> | 1.18 (1.07, 1.30)                      | 1.14 (0.94, 1.39)                      | 1.29 (1.13, 1.48)                      | 1.04 (0.83, 1.29)                      | 0.035                |

Abbreviations: M:F IRR, male-to-female incidence rate ratio; NHL, non-Hodgkin lymphoma

All models were adjusted for age at transplant, transplant year (1995–1999, 2000–2004, 2005–2009, 2010–2014, 2015–2017), race/ethnicity (non-Hispanic White, non-Hispanic Black, Hispanic, or Asian/Pacific Islander), transplanted organ (kidney, liver, heart and/or lung, or Other/multiple), Yost Index, and duration of time on the transplant wait list.

<sup>a</sup> P-value is a test for whether the M:F IRRs differ across transplanted organs and was estimated from an interaction term in the model.

<sup>b</sup> Models were additionally adjusted for prior diagnosis squamous cell carcinoma or basal cell carcinoma (time-dependent) and annual average daily UVB exposure.

<sup>c</sup> Models were additionally adjusted for BMI category (<18.5, 18.5–24.9, 25.0–29.9, or ≥30 kg/m<sup>2</sup>) and diabetes (yes, no, or missing).

<sup>d</sup> Model was additionally adjusted for BMI category (<18.5, 18.5–24.9, 25.0–29.9, or ≥30 kg/m<sup>2</sup>), diabetes (yes, no, or missing), hepatitis B and C (positive, negative, or unknown).

<sup>e</sup> Model was additionally adjusted for BMI category (<18.5, 18.5–24.9, 25.0–29.9, or ≥30 kg/m<sup>2</sup>).

<sup>f</sup> Estimates of the M:F IRR<sub>Transplant</sub> were restricted to non-Hispanic White and non-Hispanic Black participants. SEER9 (1973-1979) restricted to non-Hispanic White and non-Hispanic Black individuals to calculate the M:F IRR<sub>GP</sub>.

<sup>g</sup> Model was additionally adjusted for EBV status (positive, negative, or unknown) at time of transplant.

**Supplementary Table 4.** Male-to-female incidence rate ratios (IRRs) and 95% confidence intervals (CIs) for smoking-related cancers among lung recipients, with and without adjustment for smoking

| Cancer site | Case counts in transplant recipients |         | Incidence/100,000 person-years |         | M:F IRR <sub>Transplant</sub> (95% CI) | Smoking adjusted M:F IRR <sub>Transplant</sub> (95% CI) |
|-------------|--------------------------------------|---------|--------------------------------|---------|----------------------------------------|---------------------------------------------------------|
|             | Males                                | Females | Male                           | Females |                                        |                                                         |
| Lip         | 42                                   | 19      | 93.7                           | 49.4    | 1.90 (1.10, 3.26)                      | 1.80 (1.05, 3.11)                                       |
| Oral cavity | 18                                   | 8       | 40.1                           | 20.8    | 1.57 (0.68, 3.65)                      | 1.62 (0.70, 3.77)                                       |
| Esophagus   | 22                                   | 6       | 49.1                           | 15.6    | 3.15 (1.28, 7.76)                      | 3.07 (1.24, 7.59)                                       |
| Larynx      | 22                                   | 9       | 49.1                           | 23.4    | 2.10 (0.97, 4.56)                      | 1.94 (0.89, 4.23)                                       |
| Lung        | 312                                  | 210     | 695.7                          | 545.5   | 1.28 (1.07, 1.52)                      | 1.14 (0.96, 1.36)                                       |
| Bladder     | 40                                   | 17      | 89.2                           | 44.2    | 2.02 (1.15, 3.56)                      | 1.91 (1.08, 3.38)                                       |

Abbreviations: M:F IRR, male-to-female incidence rate ratio
